# Supplementary material for: A novel fuel electrode enabling direct CO2 electrolysis with excellent and stable cell performance
Source: Royal Society of Chemistry journal article supplement (doi:10.1039/c7ta05750d), 2017-01-01
Supplement: c7ta05750d1.pdf [file c7ta05750d1.pdf]

**A Novel fuel electrode enabling direct CO<sub>2</sub> electrolysis with excellent and stable cell  
performance**

Yihang Li<sup>a</sup>, Bobing Hu<sup>a</sup>, Changrong Xia<sup>a\*</sup>, Wayne Q. Xu<sup>b</sup>, John P. Lemmon<sup>b</sup>, Fanglin Chen<sup>c</sup>

<sup>a</sup> Key Laboratory of Materials for Energy Conversion, Chinese Academy of Sciences, Department of Materials Science and Engineering & Collaborative Innovation Center of Suzhou Nano Science and Technology, University of Science and Technology of China, No. 96 Jinzhai Road, Hefei, Anhui Province, 230026, P. R. China.

\*Tel: +86-551-63607475; Fax: +86-551-63601696; E-mail: [xiacr@ustc.edu.cn](mailto:xiacr@ustc.edu.cn) (C. Xia)

<sup>b</sup> National Institute of Clean and-Low-Carbon Energy (NICE), Beijing 102211, P. R. China.

<sup>c</sup> Department of Mechanical Engineering, University of South Carolina, 300 Main Street, Columbia, SC 29208, USA.

## The theory of distribution of relaxation time

When a lot of sub-processes contribute to the overall impedance, it is often a fraught task to use equivalent circuit models for the evaluation of EIS (electrochemical impedance spectroscopy) data. Therefore, we use a pre-identification method based on the distribution function of relaxation times, named DRT function  $g(\tau)$ , which can separate polarization processes with different time constants directly from EIS data. A sub-process is described by an equivalent circuit, a parallel connection of a resistance  $R$  and a capacitance  $C$ . For each equivalent circuit, the time constant is  $\tau_i = 1 / R_i C_i = 1 / 2\pi f_i$ . Therefore, the cell impedance can be expressed by

$$Z_{pol}(\omega) = \int_0^{\infty} \frac{g(\tau)}{1 + j\omega\tau} d\tau \quad (1)$$

where  $\frac{g(\tau)}{1 + j\omega\tau}$  represents the fraction of the overall polarization resistance with relaxation times between  $\tau$  and  $\tau + d\tau$ . The mathematical problem with this approach arises from the inversion of Eq. 1, which is necessary in order to extract  $g(\tau)$  from the measured EIS data. In this work, we use a Matlab package for regularization.

## Electrochemical relaxation characterization

The electrical conductivity relaxation (ECR) technique was performed to determine the surface exchange coefficient ( $k_{\text{ex}}$ ), which is based on the relationship between the electrical conductivity. The change in conductivity, which reflects the change in the oxygen concentration of the sample, after a step-wise change in the ambient oxygen partial pressure ( $p\text{O}_2$ ) is recorded as a function of time. The obtained data are fitted to the appropriate solution of Fick's second law, assuming linear kinetics for the surface exchange reaction, and a linear relationship between the sample conductivity and the oxygen ion concentration within the applied  $p\text{O}_2$  step change. The corresponding analytical solution is given by

$$g(t) = \frac{\sigma(t) - \sigma(0)}{\sigma(\infty) - \sigma(0)} = \frac{c(t) - c(0)}{c(\infty) - c(0)} = 1 - \sum_{m=1}^{\infty} \sum_{n=1}^{\infty} \sum_{p=1}^{\infty} \frac{2L_{\phi}^2 \exp(-\beta_m^2 Dt / x^2)}{\beta_m^2 (\beta_m^2 + L_{\beta}^2 + L_{\gamma}^2)} \times \frac{2L_{\gamma}^2 \exp(-\gamma_n^2 Dt / y^2)}{\gamma_n^2 (\gamma_n^2 + L_{\gamma}^2 + L_{\phi}^2)} \times \frac{2L_{\phi}^2 \exp(-\phi_p^2 Dt / z^2)}{\phi_p^2 (\phi_p^2 + L_{\phi}^2 + L_{\beta}^2)} \quad (2)$$

where  $g(t)$  is the normalized conductivity,  $\sigma(\infty)$  and  $\sigma(0)$  are the final and initial conductivities, respectively, and  $c(\infty)$  and  $c(0)$  are the final and initial oxygen concentrations. The parameters  $x$ ,  $y$  and  $z$  are the sample dimensions, while  $\beta_m$ ,  $\gamma_n$ ,  $\phi_p$  and are the the roots of the transcendental equations as defined by

$$L_{\beta} = \beta_m \tan \beta_m; \quad L_{\gamma} = \gamma_n \tan \gamma_n; \quad L_{\phi} = \phi_p \tan \phi_p \quad (3)$$

Meanwhile, the parameters  $L_{\beta}$ ,  $L_{\gamma}$  and  $L_{\phi}$  are defined by

$$L_{\beta} = \frac{x}{L_c}; \quad L_{\gamma} = \frac{y}{L_c}; \quad L_{\phi} = \frac{z}{L_c} \quad (4)$$

where

$$L_c = \frac{D}{k} \quad (5)$$

The parameters obtained from fitting are the chemical surface exchange coefficient,  $k$  ( $\text{m s}^{-1}$ ) and the chemical diffusion coefficient,  $D$  ( $\text{m}^2 \text{s}^{-1}$ ). When the sample is thin enough, which often means its thickness is smaller than the characteristic thickness  $L_c$ , the diffusion step is so fast that the incorporation reaction is limited only by the surface step. In addition, the relative

change of the oxygen concentration as a function of time is

$$\frac{\partial c(t)}{\partial t} = -\frac{Sk}{V} [c(t) - c(0)] \quad (6)$$

Therefore, the experimental data is fitted with the surface exchange controlling E exponential function

$$g(t) = 1 - \exp\left(-\frac{S}{V} kt\right) \quad (7)$$

where  $S$  ( $\text{m}^2$ ) is the surface area exposed to the gas phase and  $V$  ( $\text{m}^3$ ) is the sample volume.

## The theory of the average metal-oxygen bonding energy

The average metal-oxygen energy ( $\langle ABE \rangle$ ) within the perovskite lattice is calculated from the average A-O ( $\langle A-O \rangle$ ) and B-O ( $\langle B-O \rangle$ ) bond energy. The  $\langle ABE \rangle$  for  $A_w B_{1-y-z} B'_y B''_z O_{3-\delta}$  perovskite can be given by:[1]

$$\langle ABE \rangle = \langle A-O \rangle + \langle B-O \rangle \quad (8)$$

$$\langle A-O \rangle = \frac{1}{N_A \cdot m} \times (\Delta H_{AmOn} - m \times \Delta H_A - \frac{n}{2} \times D_{O_2}) \quad (9a)$$

$$\langle A-O \rangle = \frac{w}{N_A \cdot m} \times (\Delta H_{AmOn} - m \times \Delta H_A - \frac{n}{2} \times D_{O_2}) \text{ in the case of A-site deficiency} \quad (9b)$$

$$\langle B-O \rangle = \Delta \langle B-O \rangle + \Delta \langle B'-O \rangle + \Delta \langle B''-O \rangle \quad (10)$$

$$\Delta \langle B-O \rangle = \frac{x_B}{N_B \cdot m} \times (\Delta H_{BmOn} - m \times \Delta H_B - \frac{n}{2} \times D_{O_2}) \quad (11)$$

where  $w$  is the molar fraction of A-site cations in A-site deficient compositions;  $x_B$  ( $1-y-z$ ,  $y$ , and  $z$ ) is the molar fraction of B metals;  $\Delta H_{A(B)m On}$  and  $\Delta H_{A(B)}$  are the enthalpy of formation of one mole of  $A(B)m On$  oxides and the sublimation energy of  $A(B)$  metal and  $D_{O_2}$  is the dissociation energy of  $O_2$  (500.2 kJ/mol) at 25 °C.  $N_{A(B)}$  is the coordination number of cations on the A and B sites ( $N_A=12$ ,  $N_B=6$ ).

For SFM,  $\Delta H_{SrO}=-548$  kJ/mol,  $\Delta H_{Fe_2O_3}=-823$  kJ/mol,  $\Delta H_{MnO_3}=-1090$  kJ/mol,  $\Delta H_{Sr}=164.4$  kJ/mol,  $\Delta H_{Fe}=416.4$  kJ/mol,  $\Delta H_{Mn}=658.1$  kJ/mol. All the thermodynamic data can be obtained from HSC software 5.0.

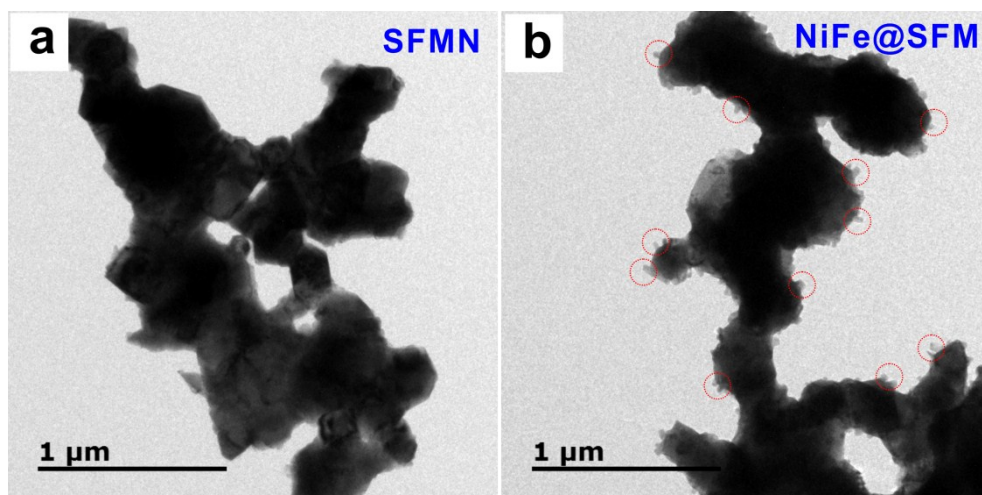

**Figure S1** The TEM images of (a) SFMN powders, and (b) NiFe@SFMN (SFMN powders reduced in H<sub>2</sub> at 800°C for 5 h)

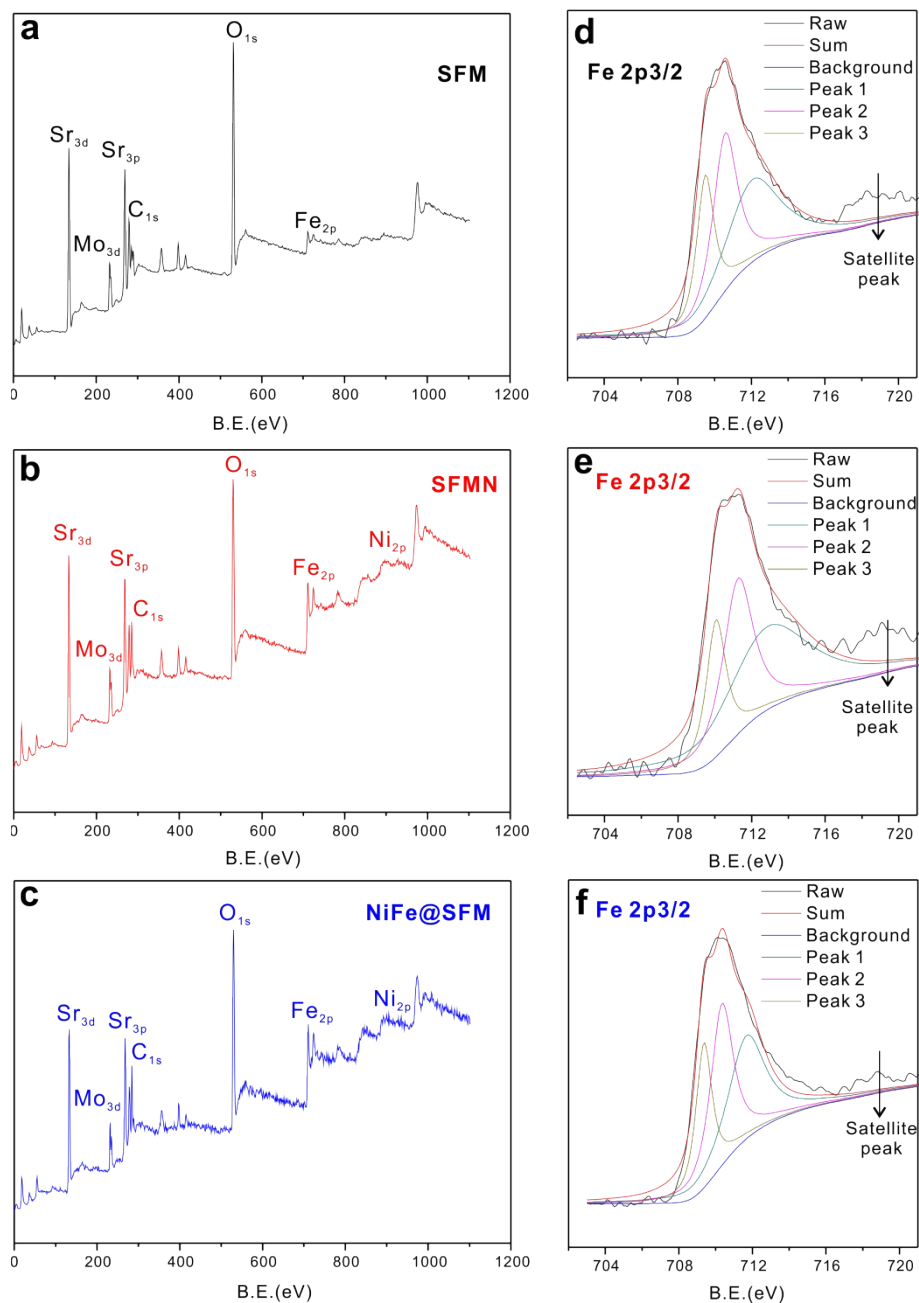

**Figure S2** XPS spectra of the survey (a, b and c) and Fe 2p<sub>3/2</sub> fitting profiles (d, e and f) for the SFM, SFMN and NiFe@SFM powders, respectively

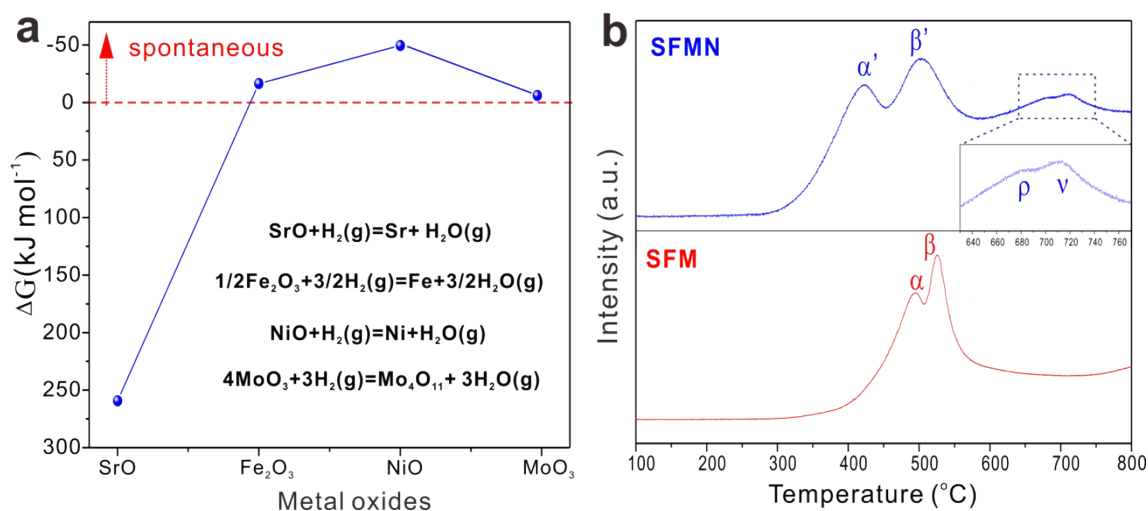

**Figure S3** (a) Gibbs free energy for the reduction reactions of oxides; (b) TPR profiles in hydrogen for SFM and SFMN powders

Fig.S3a summarizes the Gibbs free energy for the reduction reaction at 800  $^{\circ}\text{C}$  using the thermodynamic data from HSC Chemistry program 5.0. Both Ni and Fe oxides are thermodynamically favorable to be reduced but Ni oxides are easier than Fe oxides. The hydrogen temperature programmed reduction ( $\text{H}_2$ -TPR) was performed to investigate the reducibility of SFM and NiFe@SFM powder, Fig. S3b. For SFM, in accordance with previous studies, the reduction of  $\text{Fe}^{n+}$  in SFM perovskite likely occurs through two main steps, i.e., the peak of  $\alpha$  at 494  $^{\circ}\text{C}$  and  $\beta$  at 526  $^{\circ}\text{C}$ , corresponding to the reduction of  $\text{Fe}^{4+}$  into  $\text{Fe}^{3+}$  and  $\text{Fe}^{3+}$  into  $\text{Fe}^{2+}$ . For SFMN, the first reduction peak  $\alpha'$  reduced to 422  $^{\circ}\text{C}$ , and the second reduction peak  $\beta'$  to 503  $^{\circ}\text{C}$ . Two additional overlapped peaks appeared at 680  $^{\circ}\text{C}$  and 712  $^{\circ}\text{C}$ , which should be ascribed to the reduction of  $\text{Ni}^{2+}$  into metallic  $\text{Ni}^0$  and  $\text{Fe}^{2+}$  into  $\text{Fe}^0$ . With the introduction of A-site deficiency in the SFM perovskite lattice, the reducibility of Fe as well as Ni was remarkably facilitated.



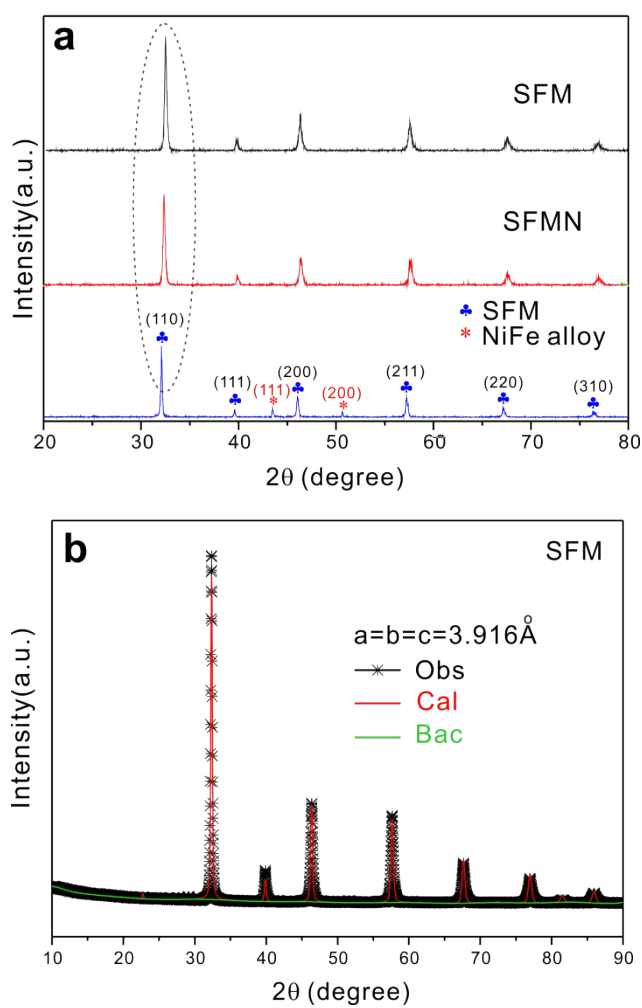

**Figure S4** (a) XRD patterns for SFM, SFMN and NiFe@SFM powders; (b) Refined XRD profiles of SFM powders. Observed (black), calculated (red), and background (green) for each sample are presented.

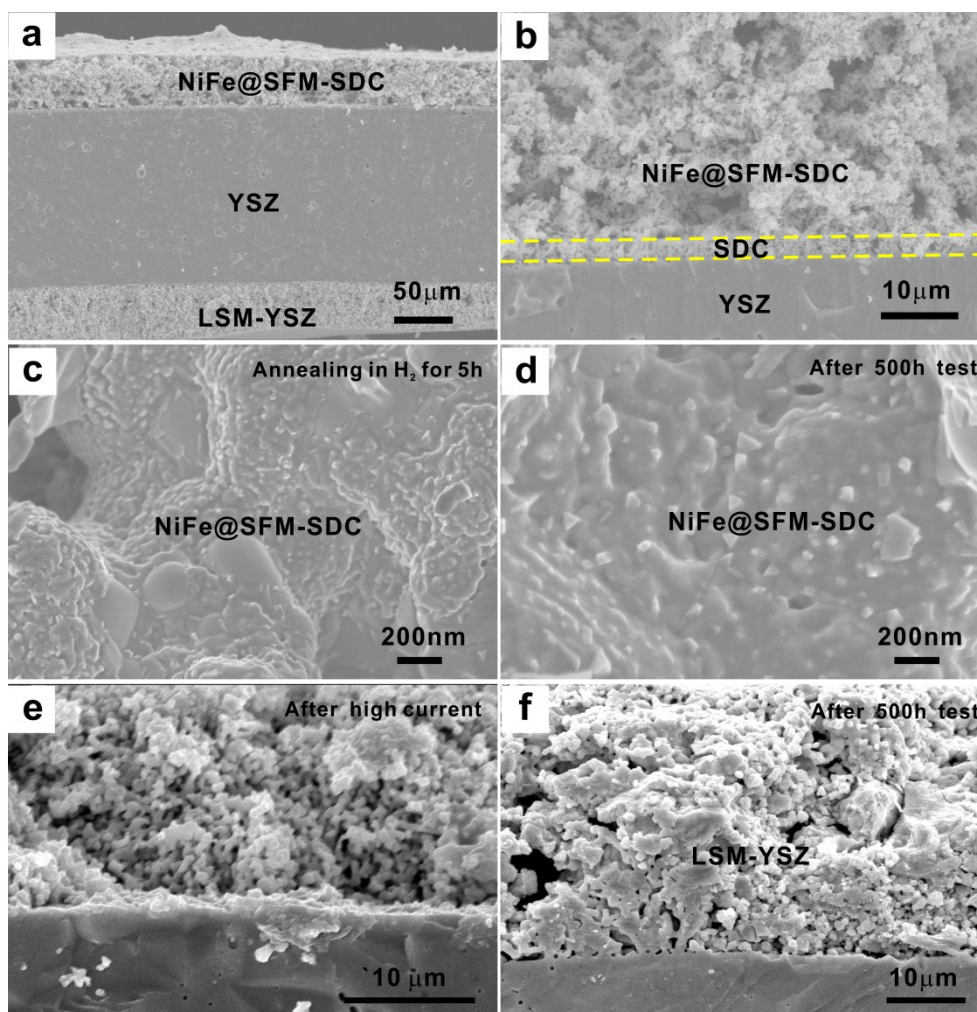

**Figure S5** The SEM images: (a) Cross-sectional view of a whole cell consisting of a LSM-YSZ air electrode, a YSZ dense electrolyte, a SDC interlayer and (b) a NiFe@SFM-SDC fuel electrode; (c) a fresh NiFe@SFM-SDC fuel electrode and (d) a post-test NiFe@SFM-SDC fuel electrode; LSM-YSZ oxygen electrodes (e) after 10 hrs test at high current density of  $2 \text{ A cm}^{-2}$  and (f) after 500 hrs long-term test at 1.3 V.

There are no observable internal cracks, either between fuel electrode and barrier layer or barrier layer and electrolyte (Fig. S5b), indicating that the relatively dense SDC layer has good contact with the fuel electrode and the electrolyte layer. The SDC interlayer will prevent the reaction between the fuel electrode and YSZ electrolyte during the cell fabrication and electrochemical performance testing.

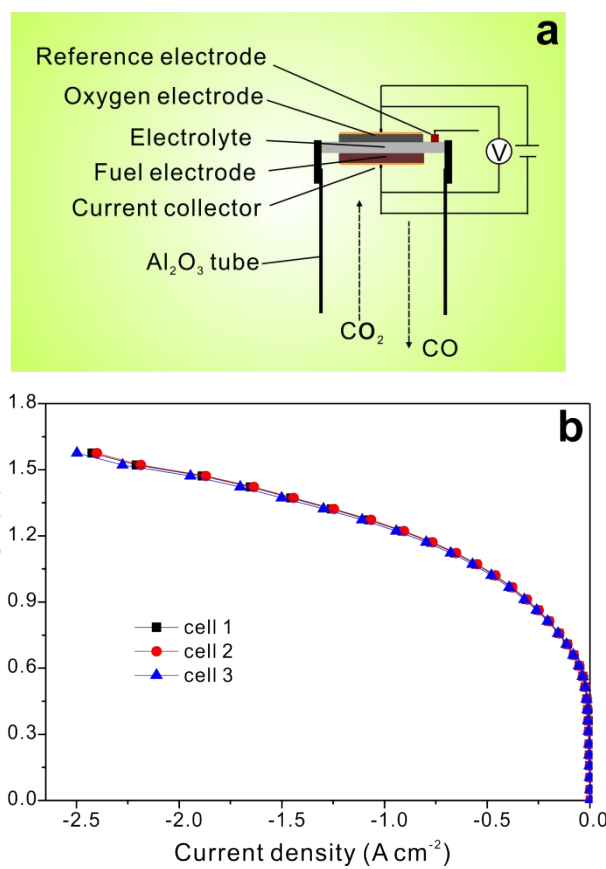

**Figure S6** (a) Cell configuration for CO<sub>2</sub> electrolysis operation in present work; (b) IV curves of three cells with NiFe@SFM fuel electrodes at 800°C, indicative of the reproducibility of the results.

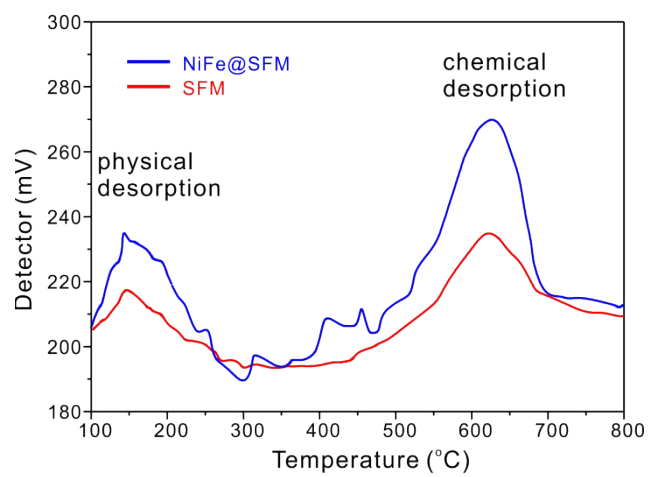

**Figure S7** CO<sub>2</sub> TPD profiles for the SFM and NiFe@SFM powders

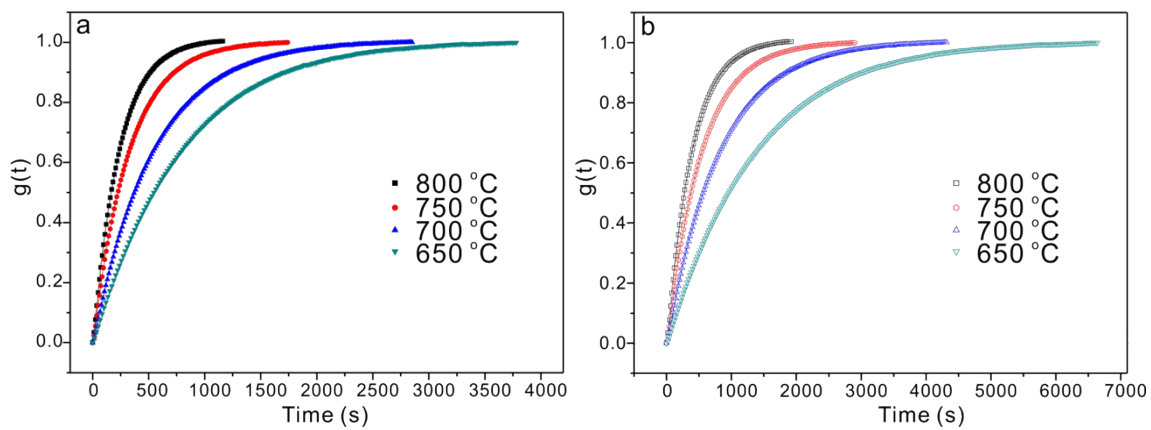

**Figure S8** Electrical conductivity relaxation curves of (a) NiFe@SFM and (b) SFM at 650-800 °C after sudden change of oxygen partial pressure.

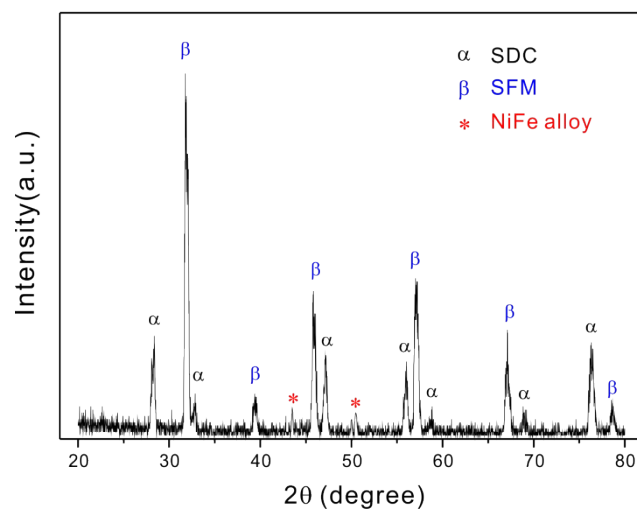

**Figure S9** XRD pattern of the NiFe@SFM-SDC fuel electrode after long-term stability test of 500 h for CO<sub>2</sub> electrolysis at 800 °C

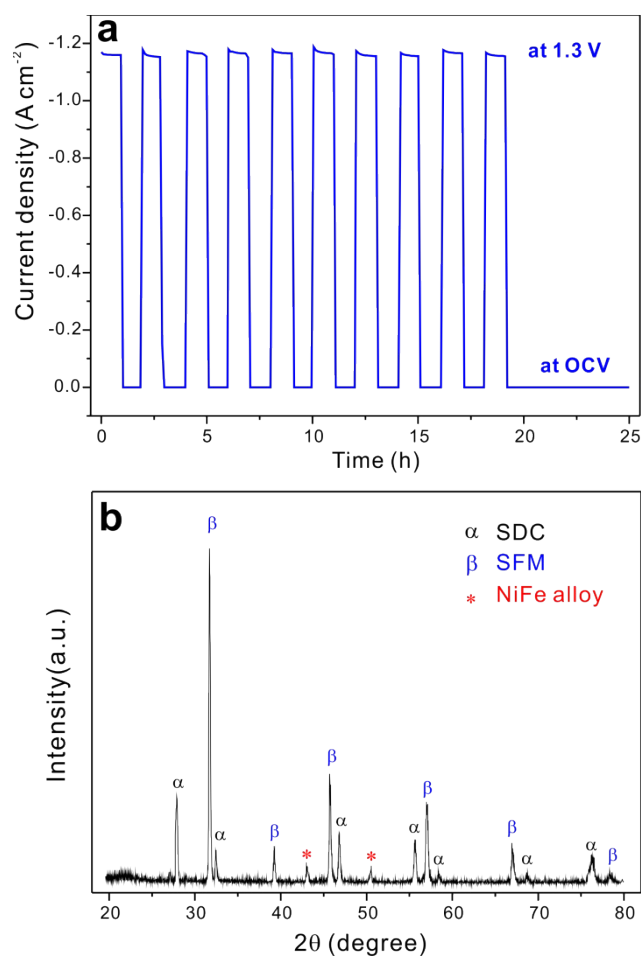

**Figure S10** (a) Current density as a function of time of cyclic test under  $\text{CO}_2$  electrolysis mode at 1.3 V and OCV mode with interval of 2 h in each mode for 10 cycles; (b) Corresponding XRD pattern for the NiFe@SFM-SDC fuel electrode after the cyclic test

**Table S1** The surface metal atom concentration and fitting data of Fe 2p<sub>3/2</sub> for the SFM, SFMN and NiFe@SFM materials through XPS survey

| Sample       | Fe 2p <sub>3/2</sub> |       |       | averag<br>e<br>state | Surface metal atom concentration |         |         |         |
|--------------|----------------------|-------|-------|----------------------|----------------------------------|---------|---------|---------|
|              | +4                   | +3    | +2    |                      | Sr                               | Fe      | Mo      | Ni      |
| SFM          | 40.22                | 36.18 | 23.60 | 3.16                 | 51.30                            | 37.21%  | 11.49%  | -       |
|              | %                    | %     | %     |                      | (50%)                            | (37.5%) | (12.5%) | (0)     |
| SFMN         | 48.00                | 31.50 | 20.50 | 3.27                 | 49.48                            | 35.92%  | 12.19%  | 2.41%   |
|              | %                    | %     | %     |                      | (48.72)                          | (38.46) | (10.26) | (2.56%) |
| NiFe@SF<br>M | 38.65                | 37.41 | 23.94 | 3.14                 | 44.39                            | 40.63%  | 10.01%  | 4.97%   |
|              | %                    | %     | %     |                      | %                                |         |         |         |

**Note:** The values in parentheses represent the correspondingly theoretical value.



**Table S2** The summary of the Rietveld refinement results for SFM, SFMN and NiFe@SFM materials

| Sample   | Space group  | a (Å) | b (Å) | c (Å) | $\omega R_p$ (%) | $R_p$ (%) | $\chi^2$ |
|----------|--------------|-------|-------|-------|------------------|-----------|----------|
| SFM      | $Pm\bar{3}m$ | 3.916 | 3.916 | 3.916 | 4.43             | 5.98      | 2.267    |
| SFMN     | $Pm\bar{3}m$ | 3.920 | 3.920 | 3.920 | 4.92             | 6.30      | 1.416    |
| NiFe@SFM | $Pm\bar{3}m$ | 3.932 | 3.932 | 3.932 | 7.86             | 6.11      | 1.975    |

**Table S3** Cell performance at 800 °C for direct CO<sub>2</sub> electrolysis using metal nanocatalysts modified perovskite fuel electrodes through *in-situ* reduction

| Initial fuel electrode composition                                                                                                               | Nanocatalysts | YSZ electrolyte (mm) | Polarization resistance (Ω cm <sup>2</sup> ) | Current density at 1.5 V (A cm <sup>-2</sup> ) |
|--------------------------------------------------------------------------------------------------------------------------------------------------|---------------|----------------------|----------------------------------------------|------------------------------------------------|
| (La <sub>0.75</sub> Sr <sub>0.25</sub> ) <sub>0.9</sub> (Cr <sub>0.5</sub> Mn <sub>0.5</sub> ) <sub>0.9</sub> Cu <sub>0.1</sub> O <sub>3-δ</sub> | Cu            | 2                    | 1.8 (at 1.2V)                                | 0.25 [2]                                       |
| (La <sub>0.2</sub> Sr <sub>0.8</sub> ) <sub>0.9</sub> (Ti <sub>0.9</sub> Mn <sub>0.1</sub> ) <sub>0.9</sub> Ni <sub>0.1</sub> O <sub>3-δ</sub>   | Ni            | 1                    | 1.2 ( at 1.6V)                               | 0.1 [3]                                        |
| (La <sub>0.2</sub> Sr <sub>0.8</sub> ) <sub>0.95</sub> Ti <sub>0.85</sub> Mn <sub>0.1</sub> Ni <sub>0.05</sub> O <sub>3-δ</sub>                  | Ni            | 0.5                  | 0.51 (at 1.6V)                               | 0.43 [4]                                       |
| (La <sub>0.75</sub> Sr <sub>0.25</sub> ) <sub>0.9</sub> (Cr <sub>0.5</sub> Mn <sub>0.5</sub> ) <sub>0.9</sub> Ni <sub>0.1</sub> O <sub>3-δ</sub> | Ni            | 1                    | 1.3 (at 1.2V)                                | 0.2 [5]                                        |

**Table S4** Cell performance at 800 °C for direct CO<sub>2</sub> electrolysis with different fuel electrode

| Fuel electrode | Electrolyte<br>Thickness (mm) | Feeding gas                | Temperature<br>(°C) | Polarization<br>resistance<br>(Ω cm <sup>2</sup> ) | Current density<br>(A cm <sup>-2</sup> ) |
|----------------|-------------------------------|----------------------------|---------------------|----------------------------------------------------|------------------------------------------|
| LST-SDC        | YSZ (2)                       | CO <sub>2</sub>            | 700                 | 16 at 1.3 V                                        | 0.05 at 1.5 V [6]                        |
| LSTM-SDC       | YSZ (2)                       | CO <sub>2</sub>            | 800                 | 2.1 at 1.6 V                                       | 0.12 at 1.5 V [7]                        |
| LSCM-SDC       | YSZ (2)                       | CO <sub>2</sub>            | 800                 | 2.7 at 1.5 V                                       | 0.09 at 1.5 V [8]                        |
| Ce-LSCrFe-YSZ  | YSZ (0.3)                     | CO <sub>2</sub>            | 850                 | 0.211 at 1.2 V                                     | 0.8 at 1.5 V [9]                         |
| Ag-GDC         | YSZ(2)                        | CO <sub>2</sub>            | 800                 | 0.9 at 0.99 V                                      | 0.75 at 1.5 V [10]                       |
| Ni-Fe (9:1)    | LSGM (0.3)                    | CO <sub>2</sub> /CO (50:1) | 800                 | 4.03 at Voc                                        | 0.87 at 1.5V [11, 12]                    |
| Ni-Fe-LSFM     | LSGM (0.3)                    | CO <sub>2</sub> /CO (50:1) | 800                 | 2.32 at Voc                                        | 1.50 at 1.5 V [12]                       |
| SFM-YSZ        | YSZ (0.01)                    | CO <sub>2</sub>            | 800                 | 0.41 at Voc                                        | 1.10 at 1.5 V [13]                       |

**Notes:** LST=La<sub>0.2</sub>Sr<sub>0.8</sub>TiO<sub>3+δ</sub>, LSTM = La<sub>0.2</sub>Sr<sub>0.8</sub>Ti<sub>0.5</sub>Mn<sub>0.5</sub>O<sub>3-δ</sub>,

LSCM= La<sub>0.75</sub>Sr<sub>0.25</sub>Cr<sub>0.5</sub>Mn<sub>0.5</sub>O<sub>3-δ</sub>, Ce-LSCrFe=La<sub>0.65</sub>Sr<sub>0.3</sub>Ce<sub>0.05</sub>Cr<sub>0.5</sub>Fe<sub>0.5</sub>O<sub>3-δ</sub>,

LSGM= La<sub>0.9</sub>Sr<sub>0.1</sub>Ga<sub>0.8</sub>Mg<sub>0.2</sub>O<sub>3-δ</sub>, LSFM= La<sub>0.6</sub>Sr<sub>0.4</sub>Fe<sub>0.8</sub>Mn<sub>0.2</sub>O<sub>3-δ</sub>, SFM=Sr<sub>2</sub>Fe<sub>1.5</sub>Mo<sub>0.5</sub>O<sub>6-δ</sub>

**Table S5** The fitting results of the EIS for two different types of cells obtained from 800°C

| Temperature<br>(°C) | Fuel electrodes  | $R_s$<br>( $\Omega \text{ cm}^2$ ) | $R_1$<br>( $\Omega \text{ cm}^2$ ) | $R_2$<br>( $\Omega \text{ cm}^2$ ) | $R_3$<br>( $\Omega \text{ cm}^2$ ) |
|---------------------|------------------|------------------------------------|------------------------------------|------------------------------------|------------------------------------|
| 800                 | NiFe@SFM-<br>SDC | 0.5624                             | 0.0502                             | 0.1207                             | 0.0934                             |
|                     | SFM-SDC          | 0.5666                             | 0.0523                             | 0.1473                             | 0.1425                             |

**Table S6** The changes of the oxygen partial pressure at 650-800 °C for ECR measurement

| Temperature<br>(°C) | CO:CO <sub>2</sub> (2:1)<br>(atm) | CO:CO <sub>2</sub> (1:1)<br>(atm) |
|---------------------|-----------------------------------|-----------------------------------|
| 800                 | $9.49 \times 10^{-20}$            | $3.79 \times 10^{-19}$            |
| 750                 | $4.30 \times 10^{-21}$            | $1.72 \times 10^{-20}$            |
| 700                 | $1.42 \times 10^{-22}$            | $5.66 \times 10^{-22}$            |
| 650                 | $3.21 \times 10^{-24}$            | $1.28 \times 10^{-23}$            |

## References

- [1] R.L. Cook, A.F. Sammells, *Solid State Ionics*, 45 (1991) 311-321.
- [2] H.X. Li, G.H. Sun, K. Xie, W.T. Qi, Q.Q. Qin, H.S. Wei, S.G. Chen, Y. Wang, Y. Zhang, Y.C. Wu, *Int J Hydrogen Energ*, 39 (2014) 20888-20897.
- [3] Y. Li, K. Xie, S. Chen, H. Li, Y. Zhang, Y. Wu, *Electrochim Acta*, 153 (2015) 325-333.
- [4] L. Ye, M. Zhang, P. Huang, G. Guo, M. Hong, C. Li, J.T. Irvine, K. Xie, *Nat Commun*, 8 (2017) 14785.
- [5] C. Ruan, K. Xie, *Catal Sci Technol*, 5 (2015) 1929-1940.
- [6] Y.X. Li, J.E. Zhou, D.H. Dong, Y. Wang, J.Z. Jiang, H.F. Xiang, K. Xie, *Phys Chem Chem Phys*, 14 (2012) 15547-15553.
- [7] W.T. Qi, Y. Gan, D. Yin, Z.Y. Li, G.J. Wu, K. Xie, Y.C. Wu, *J Mater Chem A*, 2 (2014) 6904-6915.
- [8] S.S. Xu, S.S. Li, W.T. Yao, D.H. Dong, K. Xie, *J Power Sources*, 230 (2013) 115-121.
- [9] Y.-Q. Zhang, J.-H. Li, Y.-F. Sun, B. Hua, J.-L. Luo, *Acs Appl Mater Inter*, 8 (2016) 6457-6463.
- [10] Y.M. Xie, J. Xiao, D.D. Liu, J. Liu, C.H. Yang, *J Electrochem Soc*, 162 (2015) F397-F402.
- [11] S.J. Wang, A. Inoishi, J. Hong, Y. Ju, H. Hagiwara, S. Ida, T. Ishihara, *J Mater Chem A*, 1 (2013) 12455-12461.
- [12] S.J. Wang, H. Tsuruta, M. Asanuma, T. Ishihara, *Advanced Energy Materials*, 5 (2015).
- [13] Y. Li, P. Li, B. Hu, C. Xia, *J. Mater. Chem. A*, 4 (2016) 9236-9243.
